# Supplementary material for: Carboplatin-resistance-related DNA damage repair prognostic gene signature and its association with immune infiltration in breast cancer
Source: Front Immunol. 2025 Jan 29;16:1522149. doi: 10.3389/fimmu.2025.1522149 (PMC11813922; doi:10.3389/fimmu.2025.1522149)
Supplement: Supplementary file 3 [file Table2.xlsx]

## Sheet: Sheet1
	Compound_Name_in_Dataset	Harmonized_Compound_Name	Dataset	Compound_Synonyms	Compound_Molecular_Targets	Compound_MOA
1	Epirubicin	4'-Epiadriamycin	GDSC2_v8.2	4'-Epiadriamycin:|:Ellence:|:epirubicin:|:Epirubicin:|:Epirubicin HCl:|:Farmorubicin:|:IMI-28	Anthracycline:|:CHD1:|:TOP2A	DNA replication:|:topoisomerase
2	AZ20	AZ20	GDSC1_v8.2	AZ20	ATR:|:MTOR	ATR kinase :|:Genome integrity
3	BIBR.1532	BIBR1532	GDSC2_v8.2	BIBR-1532:|:BIBR 1532:|:BIBR1532	TERT	Genome integrity:|: of telomerase reverse transcriptase:|:telomerase
4	Bleomycin	Bleomycin	GDSC1_v8.2	Bleomycin:|:Bleomycin (10 uM):|:Bleomycin (50 uM)	dsDNA break induction:|:LIG1:|:LIG3	DNA replication:|:DNA synthesis
5	Camptothecin	Camptothecin	GDSC2_v8.2	(+)-Camptothecin:|:camptothecin:|:Camptothecin:|:Camptothecine	TOP1	DNA replication:|:topoisomerase
6	Carmustine	Carmustine	GDSC2_v8.2	carmustine:|:Carmustine:|:CARMUSTINE	GSR	DNA alkylating , DNA :|:DNA alkylating |DNA :|:DNA replication
7	Cisplatin	Cisplatin	GDSC2_v8.2	CIS-DDP:|:cis-Diammineplatinum(II) dichloride:|:cisplatin:|:Cisplatin:|:Platinol	DNA crosslinker:|:XIAP	DNA alkylating , DNA synthesis :|:DNA alkylating |DNA synthesis :|:DNA replication
8	CP466722	CP466722	GDSC1_v8.2	1080622-86-1:|:CP-466722:|:CP 466722:|:CP466722	ATM	Genome integrity
9	Cyclophosphamide	Cyclophosphamide	GDSC2_v8.2	Cyclophosphamid:|:cyclophosphamide:|:Cyclophosphamide:|:CYCLOPHOSPHAMIDE:|:Cyclophosphane:|:Cytoxan:|:Neosar:|:Procytox	Alkylating agent:|:CYP2A6:|:CYP2B6:|:CYP2C18:|:CYP2C19:|:CYP2C8:|:CYP2C9:|:CYP2D6:|:CYP3A4:|:CYP3A5:|:CYP3A7	DNA alkylating :|:DNA alkylator:|:DNA replication
10	Cytarabine	Cytarabine	GDSC2_v8.2	Ara-Cytidine:|:Arabinosyl Cytosine:|:cytarabine:|:Cytarabine:|:cytarabine hydrochloride:|:Cytidine:|:U-19920	Antimetabolite:|:POLA1:|:POLB:|:POLD1:|:POLE	inducer of DNA damage:|:Other:|:ribonucleotide reductase
11	Doxorubicin	Doxorubicin	GDSC1_v8.2	Adriablastin:|:Adriamycin:|:Doxil:|:doxorubicin:|:Doxorubicin:|:Doxorubicin hydrochloride:|:Rubex	Anthracycline:|:TOP2A	DNA replication:|: of topoisomerase II:|:topoisomerase
12	Etoposide	Etoposide	GDSC1_v8.2	Eposin:|:Etopophos:|:etoposide:|:Etoposide:|:ETOPOSIDE:|:Vepesid:|:VP-16	TOP2:|:TOP2A:|:TOP2B	DNA replication:|: of topoisomerase II:|:topoisomerase
13	FEN1_3940	FEN1_3940	GDSC1_v8.2	FEN1_3940:|:SN1106019609	FEN1	Genome integrity
14	Gemcitabine	Gemcitabine	GDSC1_v8.2	gemcitabine:|:Gemcitabine:|:Gemzar:|:LY-188011	CMPK1:|:Pyrimidine antimetabolite:|:RRM1:|:RRM2:|:TYMS	DNA replication:|: of DNA replication; of ribonucleotide reductase, thymidylate synthetase, and cytidine monophosphate (UMP-CMP) kinase :|:ribonucleotide reductase
15	Irinotecan	Irinotecan	GDSC2_v8.2	(+)-Irinotecan:|:Camptosar:|:irinotecan:|:Irinotecan:|:Irinotecan HCl Trihydrate:|:irinotecan hydrochloride:|:Irinotecanum	TOP1:|:TOP1MT	DNA replication:|:topoisomerase
16	KU.55933	KU-55933	GDSC1_v8.2	KU-55933:|:KU55933	ATM:|:PRKDC	ATM kinase :|:Genome integrity:|: of ataxia telangiectasia mutated (ATM)
17	KU.60019	KU-60019	GDSC1_v8.2	KU-60019	ATM	ATM kinase :|:Genome integrity:|: of ataxia telangiectasia mutated (ATM)
18	Leflunomide	Leflunomide	GDSC2_v8.2	Arava:|:HWA-486:|:Leflunomide:|:SU-101:|:Sulol	AHR:|:DHODH:|:PTK2B:|:Pyrimidine synthesis inhibitor	dihydroorotate dehydrogenase |PDGFR tyrosine kinase receptor :|:DNA replication
19	Methotrexate	Methotrexate	GDSC1_v8.2	Abitrexate:|:Amethopterin:|:Folex:|:methotrexate:|:Methotrexate:|:METHOTREXATE(+/-):|:Rheumatrex:|:Trexall	Antimetabolite:|:DHFR	dihydrofolate reductase :|:DNA replication:|: of dihydrofolate reductase
20	Mirin	Mirin	GDSC2_v8.2	Mirin	MRE11	Genome integrity
21	Mitomycin-C	Mitomycin-C	GDSC1_v8.2	mitomycin:|:MITOMYCIN:|:mitomycin-c:|:Mitomycin-C:|:Mitosol:|:Mitozytrex:|:MMC:|:Mytozytrex:|:NSC-26980	DNA crosslinker	DNA alkylating , DNA synthesis :|:DNA alkylating |DNA synthesis :|:DNA crosslinker:|:DNA replication
22	Mitoxantrone	Mitoxantrone	GDSC2_v8.2	mitoxantrone:|:Mitoxantrone:|:Mitoxantrone HCl	TOP2A	DNA replication:|:topoisomerase
23	Telomerase Inhibitor IX	MST-312	GDSC2_v8.2	MST-312:|:MST 312:|:MST312:|:Telomerase Inhibitor IX	Telomerase:|:TERT	Genome integrity:|: of telomerase reverse transcriptase
24	Nelarabine	Nelarabine	GDSC2_v8.2	Arranon:|:Atriance:|:nelarabine:|:Nelarabine	POLA1	deoxyguanosine analog; of DNA synthesis:|:DNA replication:|:DNA synthesis , T cell :|:DNA synthesis |T cell
25	Niraparib	Niraparib	GDSC2_v8.2	MK-4827:|:MK4827:|:niraparib:|:Niraparib	PARP1:|:PARP2	Genome integrity:|:PARP
26	NU7441	NU7441	GDSC2_v8.2	KU-57788:|:NU-7432:|:NU-7741:|:NU7441	DNAPK:|:PRKDC	DNA dependent protein kinase :|:Genome integrity
27	Olaparib	Olaparib	GDSC2_v8.2	Lynparza:|:AZD2281:|:Ku-0059436:|:KU0059436:|:olaparib:|:Olaparib	PARP1:|:PARP2	Genome integrity:|: of poly (ADP-ribose) polymerase 1 and 2:|:PARP
28	Oxaliplatin	Oxaliplatin	GDSC2_v8.2	Eloxatin:|:oxaliplatin:|:Oxaliplatin	DNA alkylating agent	DNA alkylator; organoplatinum re:|:DNA :|:DNA replication
29	PARP_0108	PARP_0108	GDSC1_v8.2	PARP_0108:|:SN1044053371	PARP1:|:PARP2:|:PARP6	Genome integrity
30	PARP_9482	PARP_9482	GDSC1_v8.2	PARP_9482:|:SN1031920820	PARP1:|:PARP2:|:PARP5a	Genome integrity
31	PARP_9495	PARP_9495	GDSC1_v8.2	PARP_9495:|:SN1024601395	PARP1:|:PARP2:|:PARP7	Genome integrity
32	Pemetrexed	Pemetrexed	GDSC1_v8.2	Pemetrexed	ATIC:|:DHFR:|:GART:|:TYMS	dihydrofolate reductase |thymidylate synthase :|:DNA replication
33	PI-103	PI-103	GDSC1_v8.2	PI-103:|:PI 103:|:PI103	CLK4:|:DAPK3:|:HIPK2:|:MTOR:|:PI3Kalpha:|:PIK3CA:|:PIK3CB:|:PIK3CD:|:PIK3CG:|:PIM3:|:PRKDC	of DNA-PK, PI3K p110 delta, mTORC1, and catalytic subunits of PI3K:|:mTOR , PI3K :|:mTOR |PI3K :|:Other, kinases
34	Pyridostatin	Pyridostatin	GDSC2_v8.2	Pyridostatin	G-quadruplex stabiliser	DNA replication
35	Rucaparib	Rucaparib	GDSC1_v8.2	AG-014699:|:AG-14447:|:AG-14699:|:PF-01367338:|:Rucaparib	PARP1:|:PARP2	Genome integrity:|:PARP
36	SN-38	SN-38	GDSC1_v8.2	7-Ethyl-10-Hydroxy-Camptothecin:|:SN-38:|:SN 38	TOP1	DNA replication:|:metabolite of irinotecan; of topoisomerase I:|:topoisomerase
37	Talazoparib	Talazoparib	GDSC2_v8.2	BMN-673:|:BMN 673:|:BMN 973:|:talazoparib:|:Talazoparib	PARP1:|:PARP2	Genome integrity:|:PARP
38	TANK_1366	TANK_1366	GDSC1_v8.2	SN1032446568:|:TANK_1366	PARP5b):|:Tankyrase 1/2 (PARP5a	Genome integrity
39	Temozolomide	Temozolomide	GDSC2_v8.2	M-39831:|:SCH 52365:|:Temodal:|:Temodar:|:TEMOZOLAMIDE:|:temozolomide:|:Temozolomide	DNA alkylating agent:|:MGMT	DNA alkylating :|:DNA alkylator:|:DNA replication
40	Teniposide	Teniposide	GDSC2_v8.2	teniposide:|:Teniposide:|:TENIPOSIDE:|:Vumon	TOP2A:|:TOP2B	DNA replication:|: of topoisomerase II:|:topoisomerase
41	Topotecan	Topotecan	GDSC2_v8.2	topotecan:|:Topotecan:|:Topotecan Hydrochloride	TOP1:|:TOP1MT	DNA replication:|: of topoisomerase I:|:topoisomerase
42	VE821	VE-821	GDSC2_v8.2	VE-821:|:VE 821:|:VE821	ATR	ATR kinase :|:Genome integrity
43	VE822	VE-822	GDSC2_v8.2	Berzosertib:|:VE-822:|:VE 822:|:VE822	ATM:|:ATR:|:MTOR:|:PIK3CG	ATR kinase :|:Genome integrity
44	Veliparib	Veliparib	GDSC1_v8.2	ABT-888:|:ABT 888:|:ABT888:|:veliparib:|:Veliparib	PARP1:|:PARP2	Genome integrity:|: of poly (ADP-ribose) polymerase 1 (PARP1) and 2 (PARP2):|:PARP
